# Supplementary material for: CILP-1 Is a Biomarker for Backward Failure and Right Ventricular Dysfunction in HFrEF
Source: MDPI journal article supplement (doi:10.3390/cells12242832), 2023-12-13
Supplement: s1 [file s1]

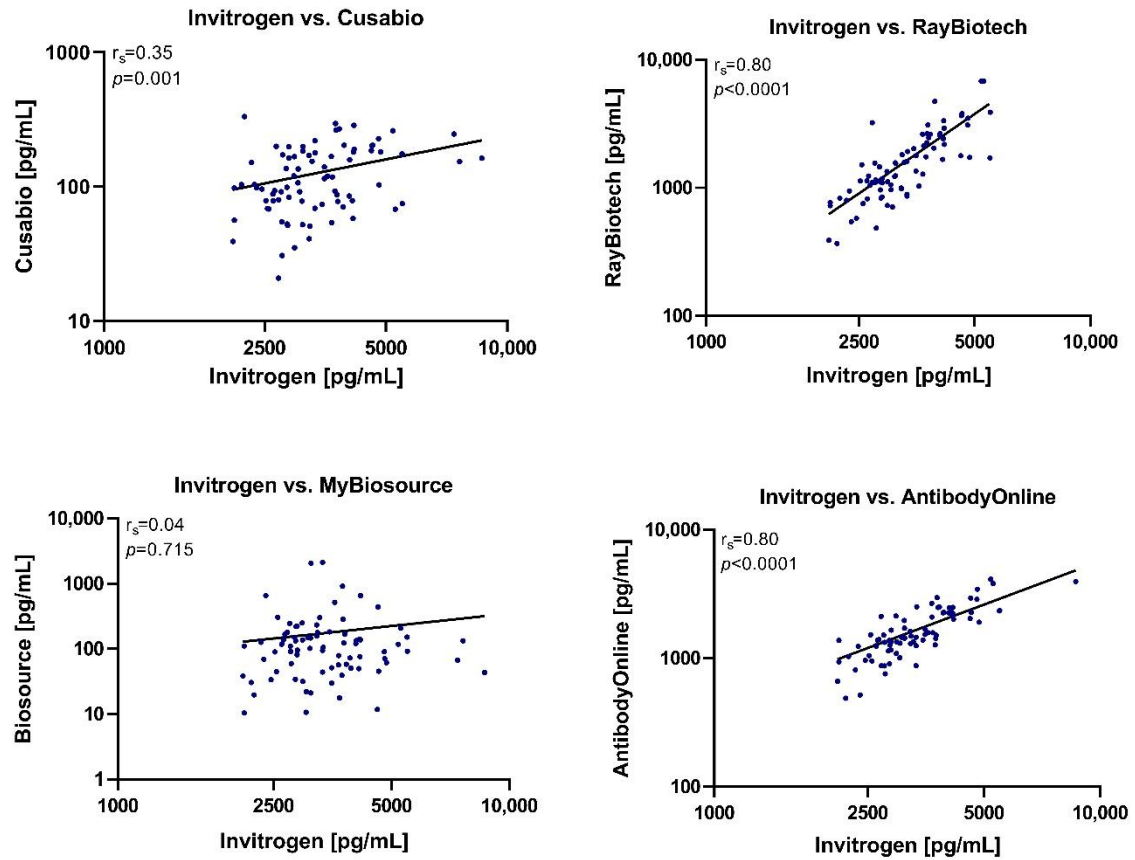

**Supplementary Figure S1.** Comparison between different commercially available CILP-1 immunoassay kits. The association of CILP-1 between ELISA kits is visualized as scatter plot, the  $p$  values are indicated within the respective plots. The Spearman correlation coefficients were calculated.
